# Supplementary material for: Translation and validation study of the Chinese version of the service user technology acceptability questionnaire
Source: PubMed Central journal article supplement — Asia Pac J Oncol Nurs. 2023 Apr 18;10(6):100239. doi: 10.1016/j.apjon.2023.100239 (PMC10242485; doi:10.1016/j.apjon.2023.100239), 2023-04-18
Supplement: mmc1.pdf [file mmc1.pdf]

## Appendix 1: Chinese version of SUTAQ

问卷说明:

尊敬的先生/女士:

您好!为了使您更好、更便捷地获得医疗、护理支持,我们正在进行关于远程照护接受度的研究。远程照护指远程医疗和远程护理,医患/护患双方借助智能手机、平板电脑、网络平台等,从简单的电话访问、微信等应用程序(APP)到视频访视、可穿戴设备监测(如,运动手环)等,涉及的内容包括远程咨询与指导、远程监测、远程家庭照护、上门服务等。请您根据自身体验及感受,在您认为最贴切的描述处打“√”,答案没有对错之分,请您如实填写。

1. 远程照护节省了我的时间,因为我不用经常去医院找我的医生或去其他医疗机构(卫生院、社区卫生服务中心等)看病

|      |      |      |       |       |       |
|------|------|------|-------|-------|-------|
| 非常同意 | 比较同意 | 有点同意 | 有点不同意 | 比较不同意 | 非常不同意 |
|------|------|------|-------|-------|-------|

2. 远程照护干扰了我的日常生活

|      |      |      |       |       |       |
|------|------|------|-------|-------|-------|
| 非常同意 | 比较同意 | 有点同意 | 有点不同意 | 比较不同意 | 非常不同意 |
|------|------|------|-------|-------|-------|

3. 远程照护增加了我获得照护的机会(从医护人员那里获得)

|      |      |      |       |       |       |
|------|------|------|-------|-------|-------|
| 非常同意 | 比较同意 | 有点同意 | 有点不同意 | 比较不同意 | 非常不同意 |
|------|------|------|-------|-------|-------|

4. 远程照护帮助我改善了健康状况

|      |      |      |       |       |       |
|------|------|------|-------|-------|-------|
| 非常同意 | 比较同意 | 有点同意 | 有点不同意 | 比较不同意 | 非常不同意 |
|------|------|------|-------|-------|-------|

5. 远程照护侵犯了我的隐私

|      |      |      |       |       |       |
|------|------|------|-------|-------|-------|
| 非常同意 | 比较同意 | 有点同意 | 有点不同意 | 比较不同意 | 非常不同意 |
|------|------|------|-------|-------|-------|

6. 医护人员充分向我解释了远程照护

|      |      |      |       |       |       |
|------|------|------|-------|-------|-------|
| 非常同意 | 比较同意 | 有点同意 | 有点不同意 | 比较不同意 | 非常不同意 |
|------|------|------|-------|-------|-------|

7. 可以信任远程照护能恰当地发挥作用

|      |      |      |       |       |       |
|------|------|------|-------|-------|-------|
| 非常同意 | 比较同意 | 有点同意 | 有点不同意 | 比较不同意 | 非常不同意 |
|------|------|------|-------|-------|-------|

8. 远程照护让我感到不舒服（比如，身体上或情感上的）

|      |      |      |       |       |       |
|------|------|------|-------|-------|-------|
| 非常同意 | 比较同意 | 有点同意 | 有点不同意 | 比较不同意 | 非常不同意 |
|------|------|------|-------|-------|-------|

9. 我对通过远程照护监测我状态的人的专业知识水平感到担心

|      |      |      |       |       |       |
|------|------|------|-------|-------|-------|
| 非常同意 | 比较同意 | 有点同意 | 有点不同意 | 比较不同意 | 非常不同意 |
|------|------|------|-------|-------|-------|

10. 远程照护减少了我对疾病治疗/照护的担心

|      |      |      |       |       |       |
|------|------|------|-------|-------|-------|
| 非常同意 | 比较同意 | 有点同意 | 有点不同意 | 比较不同意 | 非常不同意 |
|------|------|------|-------|-------|-------|

11. 远程照护使我能更加积极地参与到我的健康管理中

|      |      |      |       |       |       |
|------|------|------|-------|-------|-------|
| 非常同意 | 比较同意 | 有点同意 | 有点不同意 | 比较不同意 | 非常不同意 |
|------|------|------|-------|-------|-------|

12. 远程照护让我担心私人信息被泄露

|      |      |      |       |       |       |
|------|------|------|-------|-------|-------|
| 非常同意 | 比较同意 | 有点同意 | 有点不同意 | 比较不同意 | 非常不同意 |
|------|------|------|-------|-------|-------|

13. 远程照护可以让医护人员更好地监测我和我的病情

|      |      |      |       |       |       |
|------|------|------|-------|-------|-------|
| 非常同意 | 比较同意 | 有点同意 | 有点不同意 | 比较不同意 | 非常不同意 |
|------|------|------|-------|-------|-------|

14. 我对远程照护感到满意

|      |      |      |       |       |       |
|------|------|------|-------|-------|-------|
| 非常同意 | 比较同意 | 有点同意 | 有点不同意 | 比较不同意 | 非常不同意 |
|------|------|------|-------|-------|-------|

15. 远程照护可以/应该推荐给与我的情况类似的人

|      |      |      |       |       |       |
|------|------|------|-------|-------|-------|
| 非常同意 | 比较同意 | 有点同意 | 有点不同意 | 比较不同意 | 非常不同意 |
|------|------|------|-------|-------|-------|

16. 远程照护可以替代我的常规健康照护

|      |      |      |       |       |       |
|------|------|------|-------|-------|-------|
| 非常同意 | 比较同意 | 有点同意 | 有点不同意 | 比较不同意 | 非常不同意 |
|------|------|------|-------|-------|-------|

17. 远程照护能很好地作为常规健康照护的补充

|      |      |      |       |       |       |
|------|------|------|-------|-------|-------|
| 非常同意 | 比较同意 | 有点同意 | 有点不同意 | 比较不同意 | 非常不同意 |
|------|------|------|-------|-------|-------|

18. 远程照护不如定期与医护人员面对面咨询那么适合我

|      |      |      |       |       |       |
|------|------|------|-------|-------|-------|
| 非常同意 | 比较同意 | 有点同意 | 有点不同意 | 比较不同意 | 非常不同意 |
|------|------|------|-------|-------|-------|

19. 远程照护使我更容易与医护人员取得联系

|      |      |      |       |       |       |
|------|------|------|-------|-------|-------|
| 非常同意 | 比较同意 | 有点同意 | 有点不同意 | 比较不同意 | 非常不同意 |
|------|------|------|-------|-------|-------|

20. 远程照护干扰了我接受照护的连续性（即，我无法每次联系到相同的医护人员）

|      |      |      |       |       |       |
|------|------|------|-------|-------|-------|
| 非常同意 | 比较同意 | 有点同意 | 有点不同意 | 比较不同意 | 非常不同意 |
|------|------|------|-------|-------|-------|

21. 我担心通过远程照护监测我状态的人不知道我的既往史

|      |      |      |       |       |       |
|------|------|------|-------|-------|-------|
| 非常同意 | 比较同意 | 有点同意 | 有点不同意 | 比较不同意 | 非常不同意 |
|------|------|------|-------|-------|-------|

22. 远程照护使我减少了对自己健康状况的担心

|      |      |      |       |       |       |
|------|------|------|-------|-------|-------|
| 非常同意 | 比较同意 | 有点同意 | 有点不同意 | 比较不同意 | 非常不同意 |
|------|------|------|-------|-------|-------|

再次感谢您填写此问卷，请检查您是否已经回答了所有项目。您的回答将被保密。
